# Supplementary figures and images for: Overcoming limitations to customize DeepVariant for domesticated animals with TrioTrain
Source: HighWire-hosted journal article supplement (doi:10.1101/gr.279542.124), 2025-06-02

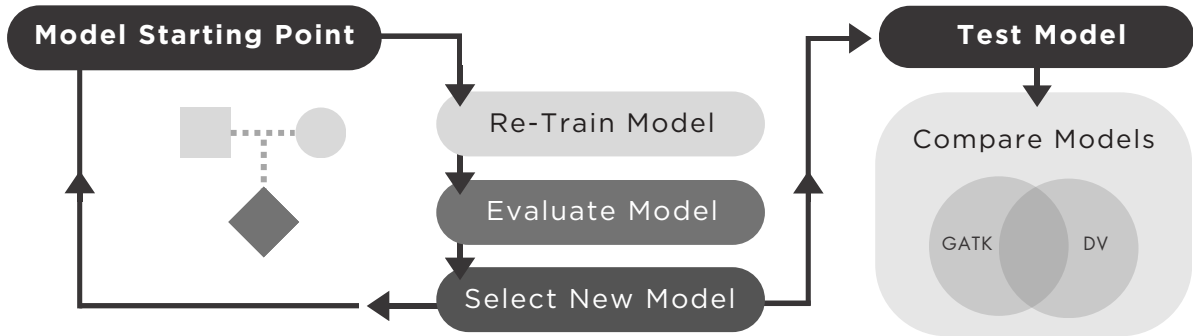

Supplement: Supplemental_Code.tar.gz [file Workflow_Sm_Horizontal.pdf › DV-TrioTrain-0.8/docs/img/Workflow_Sm_Horizontal.pdf]
